# Supplementary material for: Nano-CUT&Tag for multimodal chromatin profiling at single-cell resolution
Source: Springer Nature journal article supplement (doi:10.1038/s41596-023-00932-6), 2023-12-21

## Reporting Summary

Nature Portfolio wishes to improve the reproducibility of the work that we publish. This form provides structure for consistency and transparency in reporting. For further information on Nature Portfolio policies, see our [Editorial Policies](#) and the [Editorial Policy Checklist](#).

Please do not complete any field with "not applicable" or n/a. Refer to the help text for what text to use if an item is not relevant to your study.

For final submission: please carefully check your responses for accuracy; you will not be able to make changes later.

## Statistics

For all statistical analyses, confirm that the following items are present in the figure legend, table legend, main text, or Methods section.

n/a Confirmed

- ☒ The exact sample size ( $n$ ) for each experimental group/condition, given as a discrete number and unit of measurement
- ☒ A statement on whether measurements were taken from distinct samples or whether the same sample was measured repeatedly
- ☒ The statistical test(s) used AND whether they are one- or two-sided  
*Only common tests should be described solely by name; describe more complex techniques in the Methods section.*
- ☒ A description of all covariates tested
- ☒ A description of any assumptions or corrections, such as tests of normality and adjustment for multiple comparisons

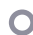

☒ A full description of the statistical parameters including central tendency (e.g. means) or other basic estimates (e.g. regression coefficient) AND variation (e.g. standard deviation) or associated estimates of uncertainty (e.g. confidence intervals)

- ☒ For null hypothesis testing, the test statistic (e.g.  $F$ ,  $t$ ,  $r$ ) with confidence intervals, effect sizes, degrees of freedom and  $P$  value noted  
*Give  $P$  values as exact values whenever suitable.*
- ☒ For Bayesian analysis, information on the choice of priors and Markov chain Monte Carlo settings
- ☒ For hierarchical and complex designs, identification of the appropriate level for tests and full reporting of outcomes
- ☒ Estimates of effect sizes (e.g. Cohen's  $d$ , Pearson's  $r$ ), indicating how they were calculated

*Our web collection on [statistics for biologists](#) contains articles on many of the points above.*

## Software and code

Policy information about [availability of computer code](#)

|                 |                                                                                                                                                                                                            |
|-----------------|------------------------------------------------------------------------------------------------------------------------------------------------------------------------------------------------------------|
| Data collection | Samples were sequenced on NovaSeq6000 (NovaSeq Control Software 1.7.5/RTA v3.4.4) with a 36nt(Read1)-8nt(Index1)-48nt(Index2)-                                                                             |
| Data analysis   | All code, scripts, analysis pipeline and instructions for reproducibility can be found on Github <a href="https://github.com/bartosovic-lab/nanoscope">https://github.com/bartosovic-lab/nanoscope</a> and |

For manuscripts utilizing custom algorithms or software that are central to the research but not yet described in published literature, software must be made available to editors and reviewers. We strongly encourage code deposition in a community repository (e.g. GitHub). See the Nature Portfolio [guidelines for submitting code & software](#) for further information.

## Data

Policy information about [availability of data](#)

All manuscripts must include a [data availability statement](#). This statement should provide the following information, where applicable:

- Accession codes, unique identifiers, or web links for publicly available datasets
- A description of any restrictions on data availability
- For clinical datasets or third party data, please ensure that the statement adheres to our [policy](#)

Raw nano-CT data was deposited in Gene Expression Omnibus under accession GSE198467.

## Human research participants

Policy information about [studies involving human research participants](#) and [Sex and Gender in Research](#).

|                             |    |
|-----------------------------|----|
| Reporting on sex and gender | NA |
| Population characteristics  | NA |
| Recruitment                 | NA |
| Ethics oversight            | NA |

Note that full information on the approval of the study protocol must also be provided in the manuscript.

## Field-specific reporting

Please select the one below that is the best fit for your research. If you are not sure, read the appropriate sections before making your selection.

☒ Life sciences ☐ Behavioural & social sciences ☐ Ecological, evolutionary & environmental sciences

## Life sciences study design

All studies must disclose on these points even when the disclosure is negative.

|                 |                                                                                                                                        |
|-----------------|----------------------------------------------------------------------------------------------------------------------------------------|
| Sample size     | Data collected from two biological replicates was used in this study. The multimodal nano-CT was performed in 2 biological replicates. |
| Data exclusions | No samples or data points were excluded in this study.                                                                                 |
| Replication     | Replication was assessed by comparing distribution of single-cell profiles in low dimensional data embedding.                          |
| Randomization   | No randomization was performed in this study.                                                                                          |
| Blinding        | The investigators were not blinded to the data.                                                                                        |

## Behavioural & social sciences study design

All studies must disclose on these points even when the disclosure is negative.

|                   |  |
|-------------------|--|
| Study description |  |
| Research sample   |  |
| Sampling strategy |  |
| Data collection   |  |
| Timing            |  |
| Data exclusions   |  |
| Non-participation |  |
| Randomization     |  |

## Ecological, evolutionary & environmental sciences study design

All studies must disclose on these points even when the disclosure is negative.

|                          |  |
|--------------------------|--|
| Study description        |  |
| Research sample          |  |
| Sampling strategy        |  |
| Data collection          |  |
| Timing and spatial scale |  |
| Data exclusions          |  |
| Reproducibility          |  |
| Randomization            |  |

Blinding

Did the study involve field work? ☒ Yes ☐ No

## Field work, collection and transport

Field conditions

Location

Access & import/export

Disturbance

## Reporting for specific materials, systems and methods

We require information from authors about some types of materials, experimental systems and methods used in many studies. Here, indicate whether each material, system or method listed is relevant to your study. If you are not sure if a list item applies to your research, read the appropriate section before selecting a response.

### Materials & experimental systems

n/a ☐ Involved in the study ☒

☒ Antibodies

☒ Eukaryotic cell lines

☒ Palaeontology and archaeology

☒ Animals and other organisms

☒ Clinical data

☒ Dual use research of concern

### Methods

n/a ☐ Involved in the study ☒

☒ ChIP-seq

☒ Flow cytometry

☒ MRI-based neuroimaging

## Antibodies

Antibodies used  The following antibodies were used in the multimodal nano-CT experiments:

Validation  Antibodies were selected based on references found in literature and are standard antibodies commonly used in ChIP-seq or CUT&Tag

## Eukaryotic cell lines

Policy information about [cell lines](#) and [Sex and Gender in Research](#)

Cell line source(s)

Authentication

Mycoplasma contamination

Commonly misidentified lines (See [ICLAC](#) register)

## Palaeontology and Archaeology

Specimen provenance

Specimen deposition

Dating methods

☐ Tick this box to confirm that the raw and calibrated dates are available in the paper or in Supplementary Information.

Ethics oversight

Note that full information on the approval of the study protocol must also be provided in the manuscript.

## Animals and other research organisms

Policy information about [studies involving animals](#); [ARRIVE guidelines](#) recommended for reporting animal research, and [Sex and Gender in Research](#)

|                         |                                                                                                                                 |
|-------------------------|---------------------------------------------------------------------------------------------------------------------------------|
| Laboratory animals      | The mouse line used in this study was generated by crossing Sox10:Cre animals (The Jackson Laboratory mouse strain 025807) on a |
| Wild animals            | No wild animals were used in this study.                                                                                        |
| Reporting on sex        | Animal sex was not considered in this study.                                                                                    |
| Field-collected samples | No field-collected samples were used in this study.                                                                             |
| Ethics oversight        | All experimental procedures on animals were performed following the European directive 2010/63/EU, local Swedish directive      |

Note that full information on the approval of the study protocol must also be provided in the manuscript.

## Clinical data

Policy information about [clinical studies](#)

All manuscripts should comply with the ICMJE [guidelines for publication of clinical research](#) and a completed [CONSORT checklist](#) must be included with all submissions.

|                             |  |
|-----------------------------|--|
| Clinical trial registration |  |
| Study protocol              |  |
| Data collection             |  |
| Outcomes                    |  |

## Dual use research of concern

Policy information about [dual use research of concern](#)

### Hazards

Could the accidental, deliberate or reckless misuse of agents or technologies generated in the work, or the application of information presented in the manuscript, pose a threat to:

| No                    | Yes                                                         |
|-----------------------|-------------------------------------------------------------|
| <input type="radio"/> | <input checked="" type="radio"/> Public health              |
| <input type="radio"/> | <input checked="" type="radio"/> National security          |
| <input type="radio"/> | <input checked="" type="radio"/> Crops and/or livestock     |
| <input type="radio"/> | <input checked="" type="radio"/> Ecosystems                 |
| <input type="radio"/> | <input checked="" type="radio"/> Any other significant area |

### Experiments of concern

Does the work involve any of these experiments of concern:

| No                    | Yes                                                                                                          |
|-----------------------|--------------------------------------------------------------------------------------------------------------|
| <input type="radio"/> | <input checked="" type="radio"/> Demonstrate how to render a vaccine ineffective                             |
| <input type="radio"/> | <input checked="" type="radio"/> Confer resistance to therapeutically useful antibiotics or antiviral agents |
| <input type="radio"/> | <input checked="" type="radio"/> Enhance the virulence of a pathogen or render a nonpathogen virulent        |
| <input type="radio"/> | <input checked="" type="radio"/> Increase transmissibility of a pathogen                                     |
| <input type="radio"/> | <input checked="" type="radio"/> Alter the host range of a pathogen                                          |
| <input type="radio"/> | <input checked="" type="radio"/> Enable evasion of diagnostic/detection modalities                           |
| <input type="radio"/> | <input checked="" type="radio"/> Enable the weaponization of a biological agent or toxin                     |
| <input type="radio"/> | <input checked="" type="radio"/> Any other potentially harmful combination of experiments and agents         |

## ChIP-seq

### Data deposition

☒ Confirm that both raw and final processed data have been deposited in a public database such as [GEO](#).

☒ Confirm that you have deposited or provided access to graph files (e.g. BED files) for the called peaks.

|                                                        |                                                                                                                                         |
|--------------------------------------------------------|-----------------------------------------------------------------------------------------------------------------------------------------|
| Data access links                                      | <a href="https://www.ncbi.nlm.nih.gov/geo/query/acc.cgi?acc=GSE198467">https://www.ncbi.nlm.nih.gov/geo/query/acc.cgi?acc=GSE198467</a> |
| Files in database submission                           | GSE198467 ATAC Seurat object clustered renamed.Rds.gz                                                                                   |
| Genome browser session<br>(e.g. <a href="#">UCSC</a> ) | <a href="https://mouse-epi-juv-brain.cells.ucsc.edu/">https://mouse-epi-juv-brain.cells.ucsc.edu/</a>                                   |

## Methodology

|                         |                                                                                                                                                                              |
|-------------------------|------------------------------------------------------------------------------------------------------------------------------------------------------------------------------|
| Replicates              | 2 biological replicates                                                                                                                                                      |
| Sequencing depth        | Between 150-400 million reads                                                                                                                                                |
| Antibodies              | <ul style="list-style-type: none"> <li>Rabbit monoclonal anti- histone H3K27ac, (Abcam, cat. no. Ab177178, RRID: AB_2828007).</li> </ul>                                     |
| Peak calling parameters | 'macs2 callpeak -t {input.cellranger_bam} -g mm -f BAMPE -n {wildcards.antibody}'                                                                                            |
| Data quality            | Peaks were verified using manual inspection.                                                                                                                                 |
| Software                | All code used in the analysis was deposited to <a href="https://github.com/mardzix/bcd_nano_CUTnTag/tree/master">https://github.com/mardzix/bcd_nano_CUTnTag/tree/master</a> |

## Flow Cytometry

### Plots

Confirm that:

- ☐ The axis labels state the marker and fluorochrome used (e.g. CD4-FITC).
- ☐ The axis scales are clearly visible. Include numbers along axes only for bottom left plot of group (a 'group' is an analysis of identical markers).
- ☐ All plots are contour plots with outliers or pseudocolor plots.
- ☐ A numerical value for number of cells or percentage (with statistics) is provided.

### Methodology

|                           |                      |
|---------------------------|----------------------|
| Sample preparation        | <input type="text"/> |
| Instrument                | <input type="text"/> |
| Software                  | <input type="text"/> |
| Cell population abundance | <input type="text"/> |
| Gating strategy           | <input type="text"/> |

☐ Tick this box to confirm that a figure exemplifying the gating strategy is provided in the Supplementary Information.

## Magnetic resonance imaging

### Experimental design

|                                 |                      |
|---------------------------------|----------------------|
| Design type                     | <input type="text"/> |
| Design specifications           | <input type="text"/> |
| Behavioral performance measures | <input type="text"/> |

### Acquisition

|                               |                                                                      |
|-------------------------------|----------------------------------------------------------------------|
| Imaging type(s)               | <input type="text"/>                                                 |
| Field strength                | <input type="text"/>                                                 |
| Sequence & imaging parameters | <input type="text"/>                                                 |
| Area of acquisition           | <input type="text"/>                                                 |
| Diffusion MRI                 | <input checked="" type="radio"/> Used <input type="radio"/> Not used |

### Preprocessing

|                            |                      |
|----------------------------|----------------------|
| Preprocessing software     | <input type="text"/> |
| Normalization              | <input type="text"/> |
| Normalization template     | <input type="text"/> |
| Noise and artifact removal | <input type="text"/> |
| Volume censoring           | <input type="text"/> |

### Statistical modeling & inference

|                                                                           |                                                                                                         |
|---------------------------------------------------------------------------|---------------------------------------------------------------------------------------------------------|
| Model type and settings                                                   | <input type="text"/>                                                                                    |
| Effect(s) tested                                                          | <input type="text"/>                                                                                    |
| Specify type of analysis:                                                 | <input checked="" type="radio"/> Whole brain <input type="radio"/> ROI-based <input type="radio"/> Both |
| Statistic type for inference<br>(See <a href="#">Eklund et al. 2016</a> ) | <input type="text"/>                                                                                    |
| Correction                                                                | <input type="text"/>                                                                                    |

## Models & analysis

n/a | Involved in the study

- ☐ Functional and/or effective connectivity
- ☐ Graph analysis
- ☐ Multivariate modeling or predictive analysis

Functional and/or effective connectivity

Graph analysis

Multivariate modeling and predictive analysis

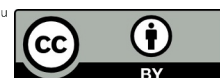

Supplement: MOESM3 [file 41596_2023_932_MOESM3_ESM14.pdf]
